# Supplementary material for: Therapeutic Neurostimulation in Obsessive-Compulsive and Related Disorders: A Systematic Review
Source: MDPI journal article supplement (doi:10.3390/brainsci11070948), 2021-07-19
Supplement: s1 [file s1]

## Quality criteria

### i. Appropriate baseline clinical characteristics reported

0= no baseline data reported

1= one or more baseline clinical characteristics missing

2= all clinical characteristics reported: diagnostic method, disease severity, treatment resistance, comorbidities, and symptom profile and disease duration for case report/series.

### ii. Prospective and/ or cohort study

0= retrospective case report/series

1= prospective case report/series or retrospective cohort study ( $n > 5$ )

2= prospective cohort ( $n \geq 5$ ) study

### iii. Randomised control trial

0= no randomization, blinding or control condition

1= single blinded sham controlled trial, or double blinded randomized trial

2= double blinded, sham controlled randomized trial

### iv. Stimulation parameters reported

0= no stimulation parameters reported

1= some stimulation parameters missing

2= all stimulation parameters reported, and frequency of treatment sessions

### v. Clinically significant responders reported

0= responders not reported

1= responders not reported in a treatment condition, or at follow-up (if applicable)

2= responders reported in all conditions, and at follow-up (if applicable)

### vi. Follow-up assessment of primary outcome

0= follow-up ( $\geq 2$  weeks) not conducted, 1 time point reported for DBS articles.

1= follow-up outcomes ( $\geq 2$  weeks) reported, 2 time points reported for DBS articles.

The overall quality assessment per article was assessed as:

Good: 8-11

Moderate: 4-7

Poor: 0-3

## Quality assessment

| Study                              | i  | ii | iii | iv | v  | vi | Overall rating |
|------------------------------------|----|----|-----|----|----|----|----------------|
| ECT Quality assessment             |    |    |     |    |    |    |                |
| Maletzky 1994 (USA)                | ✓✓ | ✓  | ✗   | ✓  | ✗  | ✓  | 5- moderate    |
| Tomruk et al., 2010 ((Turkey)      | ✓✓ | ✓  | ✗   | ✗  | ✗  | ✗  | 3- poor        |
| Liu et al., 2014 (China)           | ✓  | ✓  | ✗   | ✓  | ✗  | ✗  | 3- poor        |
| Manhas et al., 2016 (India)        | ✓  | ✓  | ✗   | ✓  | ✓  | ✓  | 5- moderate    |
| Aggarwal et al., 2019 (India)      | ✓  | ✓  | ✗   | ✓  | ✗  | ✗  | 3- poor        |
| Das et al., 2019 (India)           | ✓✓ | ✓  | ✗   | ✓  | ✗  | ✗  | 4-mderate      |
| Morais et al., 2007 (Brazil)       | ✓✓ | ✓  | ✗   | ✓✓ | ✗  | ✗  | 5-moderate     |
| Dehning et al., 2011 (Germany)     | ✓  | ✓  | ✗   | ✓✓ | ✗  | ✗  | 4-moderate     |
| Rajashree et al., 2014 (India)     | ✓✓ | ✓  | ✗   | ✓  | ✗  | ✗  | 4-moderate     |
| Guo et al., 2016 (USA)             | ✓✓ | ✓  | ✗   | ✓✓ | ✗  | ✗  | 5-moderate     |
| tDCS quality assessment            |    |    |     |    |    |    |                |
| Bation et al., 2016 (France)       | ✓✓ | ✓✓ | ✗   | ✓✓ | ✓  | ✓  | 8-good         |
| Dinn et al., 2016 (Turkey)         | ✓  | ✓✓ | ✗   | ✓✓ | ✗  | ✓  | 6-moderate     |
| Klimke et al., 2016 (Germany)      | ✓  | ✓✓ | ✗   | ✓✓ | ✓✓ | ✗  | 7-moderate     |
| D'urso et al., 2016b (Italy)       | ✓✓ | ✓✓ | ✓✓  | ✓✓ | ✗  | ✗  | 8-good         |
| Najafi et al., 2017 (Iran)         | ✓✓ | ✓✓ | ✗   | ✓✓ | ✗  | ✗  | 6-moderate     |
| Bation et al., 2019 (France)       | ✓✓ | ✓✓ | ✓✓  | ✓✓ | ✓✓ | ✓  | 11-good        |
| Godwa et al., 2019 (France)        | ✓✓ | ✓✓ | ✓✓  | ✓✓ | ✓✓ | ✗  | 10-good        |
| Kumar et al., 2019 (India)         | ✓✓ | ✓✓ | ✗   | ✓✓ | ✓✓ | ✓  | 9-good         |
| Volpato et al., 2013 (Italy)       | ✓  | ✓  | ✓   | ✓✓ | ✗  | ✗  | 5-moderate     |
| D'urso et al., 2016a (Italy)       | ✓✓ | ✓  | ✗   | ✓✓ | ✗  | ✓  | 6-moderate     |
| Mondino et al., 2015 (France)      | ✓✓ | ✓  | ✗   | ✓✓ | ✗  | ✓  | 6-moderate     |
| Narayanaswamy et al., 2015 (India) | ✓✓ | ✓  | ✗   | ✓✓ | ✗  | ✗  | 5-moderate     |

|                                      |    |    |    |    |    |   |             |
|--------------------------------------|----|----|----|----|----|---|-------------|
| Alizadeh Goradel et al., 2016 (Iran) | ✓✓ | ✓  | ✗  | ✓✓ | ✗  | ✓ | 6-moderate  |
| Hazari et al., 2016 (India)          | ✓  | ✓  | ✗  | ✓  | ✗  | ✗ | 3-poor      |
| Silva et al., 2016 (Brazil)          | ✓✓ | ✓  | ✓✓ | ✓✓ | ✗  | ✓ | 8-good      |
| Palm et al., 2017 (Germany)          | ✓  | ✓  | ✗  | ✓✓ | ✗  | ✗ | 4-moderate  |
| Mrakic-Sposta et al. 2008 (Italy)    | ✓  | ✓  | ✓  | ✓✓ | ✗  | ✗ | 5-moderate  |
| Carvalho et al., 2015 (India)        | ✓  | ✓  | ✗  | ✓✓ | ✗  | ✓ | 5-moderate  |
| Eapen et al., 2017 (Australia)       | ✓  | ✓  | ✓  | ✓  | ✗  | ✓ | 5-moderate  |
| Behler et al., 2018 (Germany)        | ✓  | ✓  | ✗  | ✓✓ | ✗  | ✗ | 4-moderate  |
| TMS quality assessment               |    |    |    |    |    |   |             |
| Alonso et al., 2001 (Spain)          | ✓  | ✓✓ | ✓✓ | ✓✓ | ✓✓ | ✓ | 10- good    |
| Sachdev et al., 2001 (Australia)     | ✓✓ | ✓✓ | ✓✓ | ✓✓ | ✓✓ | ✓ | 11- good    |
| Mantovani et al., 2006 (Italy)       | ✓  | ✓✓ | ✗  | ✓✓ | ✓✓ | ✓ | 8- good     |
| Prasko et al., 2006 (Czech Republic) | ✓✓ | ✓✓ | ✓✓ | ✓✓ | ✗  | ✓ | 9- good     |
| Sachdev et al., 2007 (Australia)     | ✓✓ | ✓✓ | ✓✓ | ✓✓ | ✓✓ | ✗ | 10- good    |
| Kang et al., 2009 (Korea)            | ✓✓ | ✓✓ | ✓✓ | ✓✓ | ✓✓ | ✓ | 11- good    |
| Ruffini et al., 2009 (Italy)         | ✓  | ✓✓ | ✓✓ | ✓✓ | ✓✓ | ✓ | 10- good    |
| Badawy et al., 2010 (Egypt)          | ✓  | ✓✓ | ✓✓ | ✓  | ✓✓ | ✗ | 8- good     |
| Mantovani et al., 2010 (USA)         | ✓✓ | ✓✓ | ✓✓ | ✓✓ | ✓✓ | ✗ | 10- good    |
| Sarkhel et al., 2010 (India)         | ✓  | ✓✓ | ✓  | ✓✓ | ✗  | ✓ | 7- moderate |
| Kumar & Chadda 2011 (India)          | ✓  | ✓✓ | ✗  | ✓✓ | ✗  | ✗ | 5- moderate |
| Mansur et al., 2011 (Brazil)         | ✓  | ✓✓ | ✓✓ | ✓✓ | ✓✓ | ✓ | 10- good    |
| Gomes et al., 2012 (Brazil)          | ✓  | ✓✓ | ✓✓ | ✓✓ | ✓✓ | ✓ | 10- good    |
| Nauczyciel et al., 2014 (France)     | ✓✓ | ✓✓ | ✓✓ | ✓✓ | ✗  | ✓ | 9- good     |
| Xiaoyan et al., 2014 (China)         | ✓  | ✓✓ | ✓✓ | ✓✓ | ✓✓ | ✗ | 9- good     |
| Elbeh et al., 2015 (Egypt)           | ✓  | ✓✓ | ✓✓ | ✓✓ | ✗  | ✓ | 8- good     |

|                                          |    |    |    |    |    |   |              |
|------------------------------------------|----|----|----|----|----|---|--------------|
| Haghighi et al., 2015 (Iran)             | ✓  | ✓✓ | ✓  | ✓✓ | ✓✓ | ✗ | 8- good      |
| Modirrousta et al., 2014 (Canada)        | ✓✓ | ✓✓ | ✗  | ✓✓ | ✗  | ✗ | 6- moderate  |
| Dunlop et al., 2016 (Canada)             | ✓✓ | ✓✓ | ✗  | ✓✓ | ✓✓ | ✗ | 8- good      |
| Hawken et al., 2016 (Turkey, Bulgaria)   | ✓✓ | ✓✓ | ✓✓ | ✓✓ | ✓✓ | ✓ | 11- good     |
| Pallanti et al., 2016 (Italy)            | ✓✓ | ✓✓ | ✗  | ✓✓ | ✓✓ | ✗ | 8- good      |
| Pelissolo et al., 2016 (France)          | ✓✓ | ✓✓ | ✓✓ | ✓✓ | ✓✓ | ✗ | 10- good     |
| Seo et al., 2016 (Korea)                 | ✓✓ | ✓✓ | ✓✓ | ✓✓ | ✓✓ | ✗ | 10- good     |
| Donse et al., 2017 (Netherlnds)          | ✓✓ | ✓✓ | ✗  | ✓✓ | ✓✓ | ✗ | 8- good      |
| Lee et al., 2017 (Korea)                 | ✓✓ | ✓✓ | ✗  | ✓✓ | ✗  | ✗ | 6- moderate  |
| Arumugham et al., 2018 (India)           | ✓✓ | ✓✓ | ✓✓ | ✓✓ | ✓✓ | ✗ | 10- good     |
| Carmi et al., 2018 (Israel)              | ✓✓ | ✓✓ | ✓✓ | ✓✓ | ✓✓ | ✗ | 10- moderate |
| Kumar et al., 2018 (India)               | ✓✓ | ✓  | ✗  | ✓✓ | ✓✓ | ✓ | 8- good      |
| Carmi et al., 2019 (US, Israel, Canada)  | ✓✓ | ✓✓ | ✓✓ | ✓✓ | ✓✓ | ✓ | 11- good     |
| Harika-Germaineau et al., 2019 (France)  | ✓✓ | ✓✓ | ✓✓ | ✓✓ | ✓✓ | ✓ | 11- good     |
| Singh et al., 2019 (India)               | ✓✓ | ✓  | ✗  | ✓✓ | ✓✓ | ✗ | 7-moderate   |
| Chae et al., 2004 (US)                   | ✓  | ✓  | ✗  | ✓✓ | ✓  | ✗ | 5- moderate  |
| Orth et al., 2005 (UK)                   | ✓  | ✓  | ✓  | ✓✓ | ✗  | ✗ | 5- moderate  |
| Kwon et al., 2011 (South Korea)          | ✓  | ✓✓ | ✗  | ✓✓ | ✗  | ✓ | 6- moderate  |
| Le et al., 2013 (China)                  | ✓  | ✓✓ | ✗  | ✓✓ | ✗  | ✓ | 6- moderate  |
| Wu et al., 2014 (USA)                    | ✓  | ✓✓ | ✓✓ | ✓✓ | ✓✓ | ✗ | 9- good      |
| Landeros-Weisenberger et al., 2015 (USA) | ✓✓ | ✓✓ | ✓✓ | ✓✓ | ✓✓ | ✗ | 10- good     |
| Bloch et al., 2016 (Israel)              | ✓✓ | ✓✓ | ✗  | ✓✓ | ✗  | ✗ | 6- moderate  |
| Aydin et al., 2019 (Turkey)              | ✓  | ✓✓ | ✓✓ | ✓✓ | ✓✓ | ✗ | 9- good      |
| Mantovani et al., 2007 (USA)             | ✓  | ✓  | ✗  | ✓✓ | ✗  | ✓ | 5- moderate  |
| Talaei et al., 2009 (Iran)               | ✓  | ✓  | ✗  | ✓✓ | ✗  | ✗ | 4- moderate  |

|                                            |   |   |    |    |    |   |             |
|--------------------------------------------|---|---|----|----|----|---|-------------|
| Mantovani et al., 2010 (USA)               | ✓ | ✓ | ✗  | ✓✓ | ✓✓ | ✗ | 6- moderate |
| Wu et al., 2010 (UK)                       | ✓ | ✓ | ✓✓ | ✓✓ | ✗  | ✗ | 6- moderate |
| Volpato et al., 2013 (Italy)               | ✓ | ✓ | ✗  | ✓✓ | ✗  | ✗ | 4- moderate |
| Salatino et al., 2014 (Italy)              | ✓ | ✓ | ✗  | ✓✓ | ✗  | ✗ | 4- moderate |
| Diefenbach et al. 2015 (USA)               | ✓ | ✓ | ✗  | ✓✓ | ✗  | ✓ | 5- moderate |
| Winkelbeiner et al., 2018<br>(Switzerland) | ✓ | ✗ | ✗  | ✓✓ | ✗  | ✗ | 3- poor     |
| Kar et al., 2019 (India)                   | ✓ | ✓ | ✗  | ✓✓ | ✓✓ | ✗ | 6- moderate |

### DBS quality assessment

|                                          |    |    |    |    |    |   |             |
|------------------------------------------|----|----|----|----|----|---|-------------|
| Nuttin et al., 2003 (Belgium)            | ✓  | ✓✓ | ✓✓ | ✓✓ | ✓  | ✓ | 9- good     |
| Abelson et al., 2005 (USA)               | ✓  | ✓  | ✓✓ | ✓✓ | ✓✓ | ✓ | 9- good     |
| Greenberg et al., 2006 (USA)             | ✓✓ | ✓✓ | ✗  | ✓✓ | ✓✓ | ✓ | 9- good     |
| Mallet et al., 2008 (France)             | ✓✓ | ✓✓ | ✓✓ | ✓✓ | ✓✓ | ✗ | 10- good    |
| Goodman et al., 2010 (USA)               | ✓✓ | ✓✓ | ✓✓ | ✓✓ | ✓✓ | ✗ | 10- good    |
| Greenberg et al., 2010 (USA,<br>Belgium) | ✓✓ | ✓✓ | ✗  | ✓  | ✓✓ | ✓ | 8- good     |
| Huff et al, 2010 (Germany)               | ✓✓ | ✓✓ | ✓✓ | ✓✓ | ✓  | ✓ | 10- good    |
| Mantione et al., 2014 (Netherlands)      | ✓  | ✓✓ | ✓✓ | ✓  | ✓✓ | ✓ | 9- good     |
| Suetens et al., 2014 (Belgium)           | ✓  | ✓✓ | ✓✓ | ✗  | ✓  | ✗ | 6- moderate |
| Islam et al., 2015 (Italy)               | ✓✓ | ✓✓ | ✗  | ✓✓ | ✓✓ | ✓ | 9- good     |
| Fayad et al., 2016 (USA)                 | ✓  | ✓✓ | ✗  | ✓✓ | ✓  | ✓ | 7- moderate |
| Luyten et al., 2016 (Belgium)            | ✓✓ | ✓✓ | ✓  | ✓✓ | ✓✓ | ✓ | 10- good    |
| Farrand et al., 2018 (Australia)         | ✓✓ | ✓✓ | ✗  | ✗  | ✓✓ | ✗ | 6- moderate |
| Barcia et al., 2019 (Spain)              | ✓✓ | ✓✓ | ✓✓ | ✓  | ✓✓ | ✓ | 10- good    |
| Lee et al., 2019 (USA)                   | ✓✓ | ✓✓ | ✗  | ✓✓ | ✓✓ | ✓ | 9- good     |
| Huys et al., 2019 (Germany)              | ✓  | ✓✓ | ✗  | ✓✓ | ✓✓ | ✓ | 8- good     |
| Mallet et al., 2019 (France)             | ✓✓ | ✓✓ | ✗  | ✓✓ | ✓✓ | ✓ | 9- good     |

|                                       |    |    |    |    |    |   |              |
|---------------------------------------|----|----|----|----|----|---|--------------|
| Tyagi et al., 2019 (UK)               | ✓✓ | ✓✓ | ✓  | ✓✓ | ✓✓ | ✓ | 10- good     |
| Liebrand et al., 2019 (Netherlands)   | ✓✓ | ✓  | ✗  | ✓✓ | ✓✓ | ✗ | 7- moderate  |
| Gabriels et al., 2003 (Belgium)       | ✓✓ | ✓  | ✗  | ✗  | ✗  | ✗ | 3- poor      |
| Franzini et al., 2010 (Italy)         | ✓✓ | ✓  | ✗  | ✓✓ | ✗  | ✗ | 5- moderate  |
| Grant et al., 2011 (USA)              | ✓  | ✓  | ✗  | ✗  | ✗  | ✗ | 2- poor      |
| Roh et al., 2012 (South Korea)        | ✓✓ | ✓  | ✗  | ✓✓ | ✓✓ | ✗ | 7- moderate  |
| Coenen et al., 2014 (Germany)         | ✓  | ✓  | ✗  | ✓✓ | ✓✓ | ✗ | 6- moderate  |
| Tsai et al., 2014 (China)             | ✓✓ | ✓  | ✗  | ✓  | ✗  | ✗ | 4- moderate  |
| Maarouf et al., 2016 (Germany)        | ✓✓ | ✗  | ✗  | ✓✓ | ✓✓ | ✗ | 6- moderate  |
| Chang et al., 2017 (China)            | ✓✓ | ✓  | ✗  | ✓✓ | ✗  | ✓ | 6- moderate  |
| Choudhury et al., 2017 (USA)          | ✓✓ | ✓  | ✗  | ✓✓ | ✗  | ✓ | 6- moderate  |
| Gupta et al., 2019 (India)            | ✓✓ | ✓  | ✗  | ✗  | ✓✓ | ✓ | 6- moderate  |
| Maciunas et al., 2007 (USA)           | ✓  | ✓✓ | ✓✓ | ✓✓ | ✓✓ | ✗ | 9- moderate  |
| Servello et al., 2008 (UK)            | ✓✓ | ✓✓ | ✗  | ✓✓ | ✗  | ✗ | 6- moderate  |
| Porta et al., 2009 (UK)               | ✓  | ✓✓ | ✗  | ✗  | ✗  | ✗ | 3- poor      |
| Ackermans et al., 2011 (Netherlands)  | ✓✓ | ✓✓ | ✓✓ | ✓✓ | ✓✓ | ✓ | 11- good     |
| Martinez-Fernandez et al., 2011 (USA) | ✓  | ✓✓ | ✗  | ✓✓ | ✗  | ✗ | 5- moderate  |
| Cannon et al., 2012 (Australia)       | ✓  | ✓✓ | ✗  | ✓✓ | ✓✓ | ✓ | 8- good      |
| Porta et al., 2012 (Italy)            | ✓✓ | ✓✓ | ✗  | ✓✓ | ✗  | ✗ | 6- moderate  |
| Motlagh et al., 2013 (USA)            | ✓✓ | ✓✓ | ✗  | ✓✓ | ✓✓ | ✓ | 9- moderate  |
| Okun et al., 2013 (USA)               | ✓✓ | ✓✓ | ✓✓ | ✓✓ | ✓✓ | ✗ | 10- moderate |
| Sachdev et al., 2014 (Australia)      | ✓✓ | ✓✓ | ✗  | ✓  | ✓✓ | ✗ | 7- moderate  |
| Zhang et al., 2014 (China)            | ✓  | ✓  | ✗  | ✓  | ✓✓ | ✓ | 6- moderate  |
| Kefalopoulou et al., 2015 (UK)        | ✓✓ | ✓✓ | ✓✓ | ✓✓ | ✓✓ | ✗ | 10- good     |
| Huys et al., 2016 (Germany)           | ✓✓ | ✓✓ | ✗  | ✓✓ | ✗  | ✓ | 7- moderate  |

|                                     |    |    |   |    |    |   |             |
|-------------------------------------|----|----|---|----|----|---|-------------|
| Rossi et al., 2016 (USA)            | ✓  | ✓✓ | ✗ | ✓  | ✓✓ | ✗ | 6- moderate |
| Testini et al., 2016 (USA)          | ✓  | ✓✓ | ✗ | ✓  | ✓✓ | ✗ | 6- moderate |
| Welter et al., 2017 (France)        | ✓✓ | ✓✓ | ✗ | ✓✓ | ✓✓ | ✓ | 9- good     |
| Azimi et al., 2018 (Iran)           | ✓✓ | ✓✓ | ✗ | ✓✓ | ✗  | ✗ | 6- moderate |
| Brito et al., 2019 (Brazil)         | ✓  | ✓✓ | ✗ | ✗  | ✓✓ | ✗ | 5- moderate |
| Welter et al., 2019 (France)        | ✓  | ✓✓ | ✗ | ✗  | ✓✓ | ✓ | 6- moderate |
| Diederich et al., 2005 (Australia)  | ✓✓ | ✗  | ✗ | ✓✓ | ✗  | ✗ | 4- moderate |
| Flaherty et al., 2005 (USA)         | ✓  | ✗  | ✗ | ✓✓ | ✗  | ✗ | 3- poor     |
| Houeto et al., 2005 (France)        | ✓✓ | ✗  | ✗ | ✓✓ | ✗  | ✓ | 5- moderate |
| Kuhn et al., 2007 (Germany)         | ✓  | ✗  | ✗ | ✓✓ | ✗  | ✗ | 3- poor     |
| Shahed et al., 2007 (USA)           | ✓✓ | ✗  | ✗ | ✓✓ | ✗  | ✗ | 4- moderate |
| Shields et al., 2008 (USA)          | ✓✓ | ✗  | ✗ | ✓  | ✗  | ✓ | 4- moderate |
| Dehning et al., 2008 (Germany)      | ✓  | ✗  | ✗ | ✓✓ | ✗  | ✓ | 4- moderate |
| Welter et al., 2008 (France)        | ✓  | ✗  | ✗ | ✓  | ✗  | ✗ | 2- poor     |
| Dehning et al., 2011 (Germany)      | ✓  | ✗  | ✗ | ✓  | ✓✓ | ✓ | 5- moderate |
| Pullen et al., 2011 (USA)           | ✓  | ✓  | ✗ | ✗  | ✗  | ✗ | 2- poor     |
| Rzesnitze et al., 2011 (USA)        | ✓✓ | ✗  | ✗ | ✓✓ | ✗  | ✗ | 4- moderate |
| Piedimonte et al., 2013 (Argentina) | ✓  | ✗  | ✗ | ✓✓ | ✓✓ | ✓ | 6- moderate |
| Savica et al., 2012 (USA)           | ✓  | ✗  | ✗ | ✓✓ | ✓✓ | ✗ | 5- moderate |
| Massano et al., 2013 (Portugal)     | ✓✓ | ✗  | ✗ | ✓✓ | ✓✓ | ✓ | 7- moderate |
| Dong et al., 2014 (China)           | ✓✓ | ✗  | ✗ | ✓✓ | ✗  | ✓ | 5- moderate |
| Huasen et al., 2014 (UK)            | ✓✓ | ✗  | ✗ | ✓✓ | ✗  | ✗ | 4- moderate |
| Nair et al., 2014 (Australia)       | ✓  | ✓  | ✗ | ✓✓ | ✓✓ | ✗ | 6- moderate |
| Patel et al., 2014 (USA)            | ✓✓ | ✗  | ✗ | ✓✓ | ✗  | ✗ | 4- moderate |
| Wojtecki et al., 2016 (Germany)     | ✓  | ✓  | ✗ | ✓✓ | ✗  | ✓ | 5- moderate |

|                                   |    |   |   |    |    |   |             |
|-----------------------------------|----|---|---|----|----|---|-------------|
| Kano et al., 2018 (Japan)         | ✓  | ✗ | ✗ | ✓✓ | ✗  | ✓ | 4- moderate |
| Kakusa et al., 2019 (USA)         | ✓✓ | ✗ | ✗ | ✓✓ | ✓✓ | ✓ | 7- moderate |
| Rossi et al., 2019 (Argentina)    | ✓  | ✗ | ✗ | ✓✓ | ✗  | ✓ | 4- moderate |
| Zhu et al., 2019 (China)          | ✓  | ✗ | ✗ | ✓✓ | ✗  | ✗ | 3- poor     |
| Burdick et al., 2010 (USA)        | ✓✓ | ✗ | ✗ | ✓✓ | ✗  | ✓ | 5- moderate |
| Baldermann et al., 2016 (Germany) | ✓✓ | ✗ | ✗ | ✓✓ | ✗  | ✗ | 4- moderate |
