# Supplementary material for: Therapeutic Neurostimulation in Obsessive-Compulsive and Related Disorders: A Systematic Review
Source: Brain Sci. 2021 Jul 19;11(7):948. doi: 10.3390/brainsci11070948 (PMC8307974; doi:10.3390/brainsci11070948)
Supplement: Supplementary file 1 [file brainsci-11-00948-s001.zip]

Archive with 5 entries (5 files):
- S1 PRISMA diagram.pdf
- S2 Risk of Bias Table.pdf
- S3 Quality assessment table.pdf
- S4 DBS targets.pdf
- Supplementary results.pdf
