# Supplementary figures and images for: Therapeutic Neurostimulation in Obsessive-Compulsive and Related Disorders: A Systematic Review
Source: MDPI journal article supplement (doi:10.3390/brainsci11070948), 2021-07-19

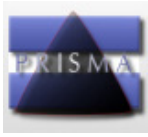

## Neurostimulation PRISMA Flow Diagram

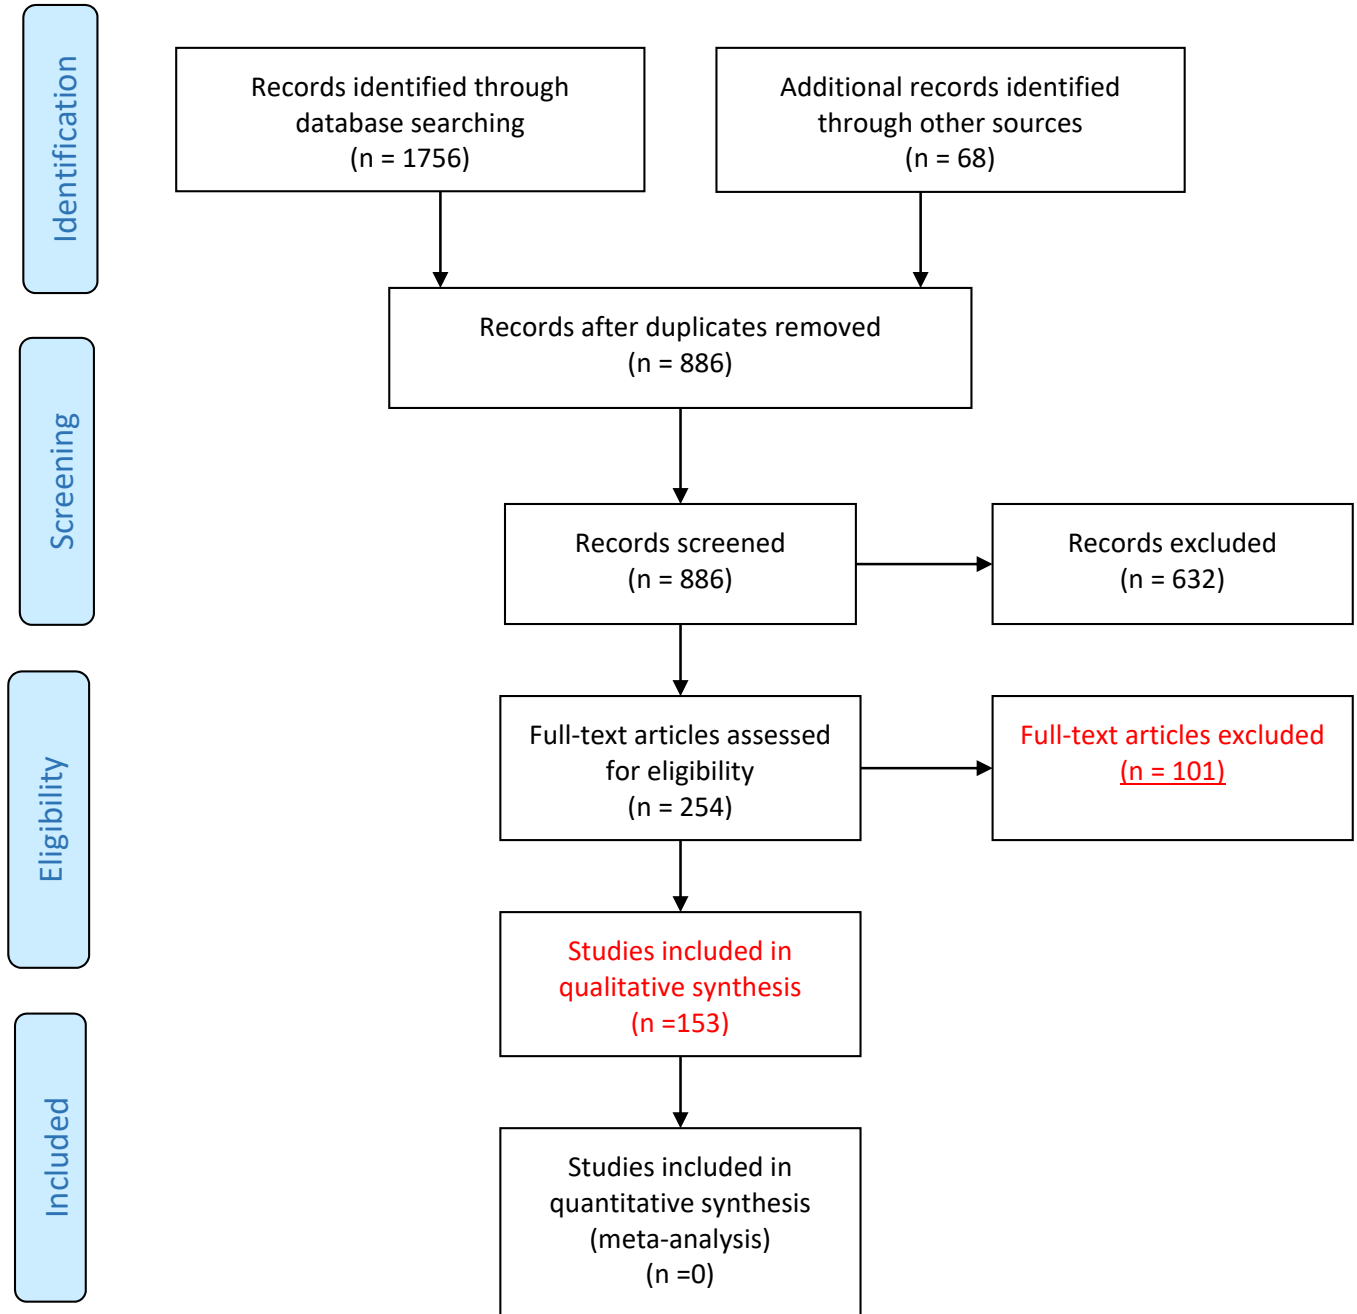

Supplement: s1 [file s1]
